# Supplementary material
Source: PubMed Central journal article supplement (PMC8885846)

# Extended Data Fig 10a

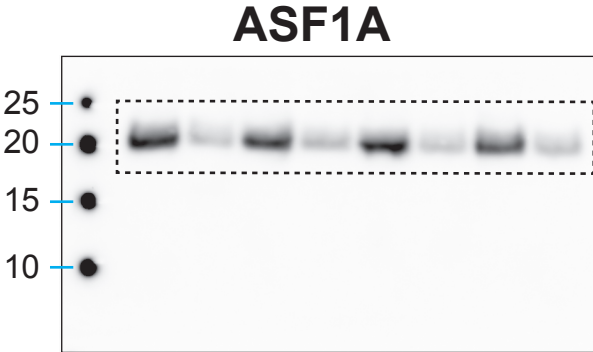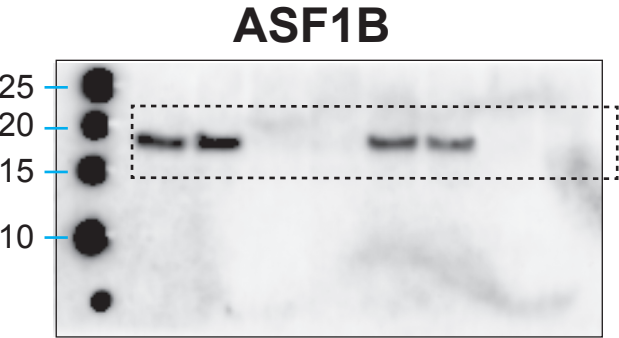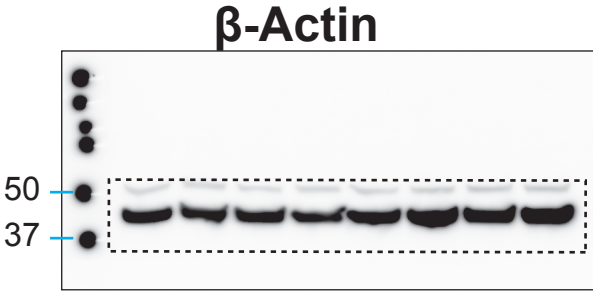

Supplement: NIHMS1759641-supplement-Ext_Data_Figure_10_unprocessed_western_blots.pdf [file NIHMS1759641-supplement-Ext_Data_Figure_10_unprocessed_western_blots.pdf]

**Fig 1b**

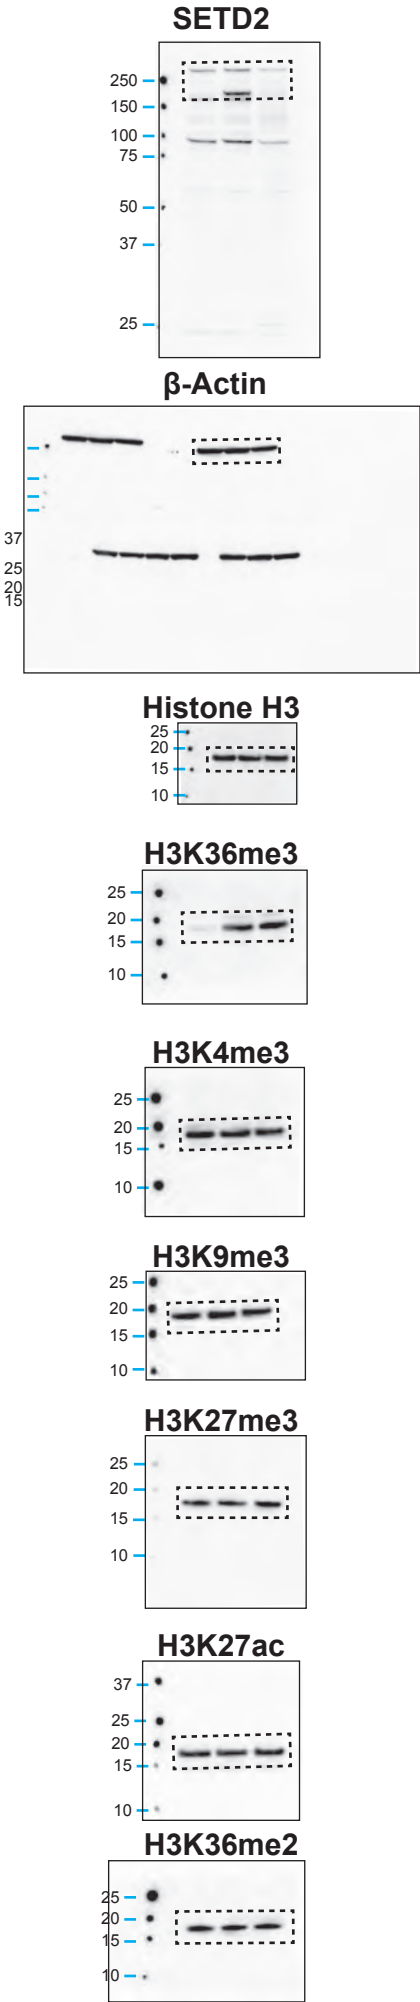

Supplement: NIHMS1759641-supplement-Figure_1_unprocessed_western_blots.pdf [file NIHMS1759641-supplement-Figure_1_unprocessed_western_blots.pdf]

**Fig 2c**

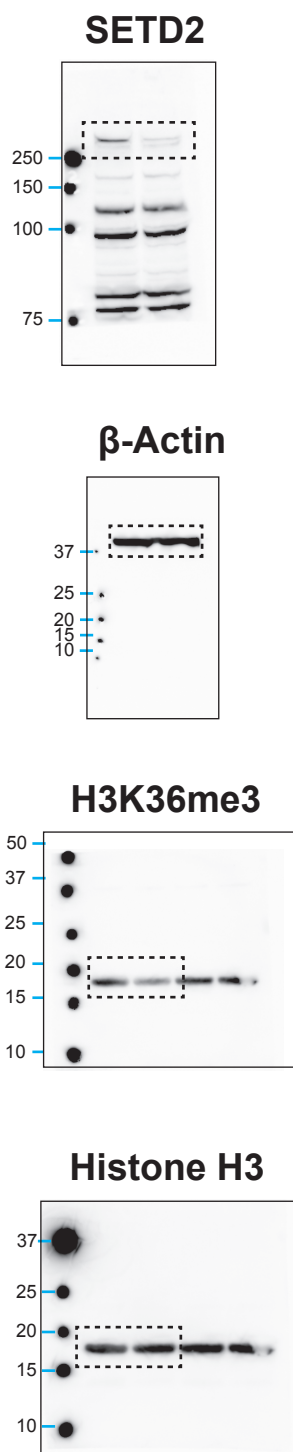

Supplement: NIHMS1759641-supplement-Figure_2_unprocessed_western_blots.pdf [file NIHMS1759641-supplement-Figure_2_unprocessed_western_blots.pdf]

**Fig 4f**

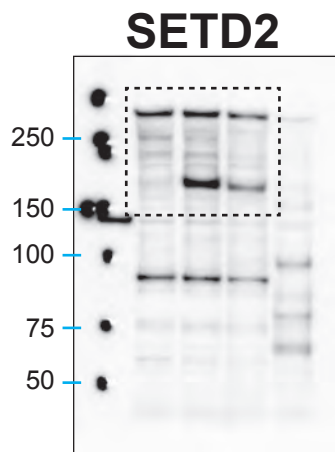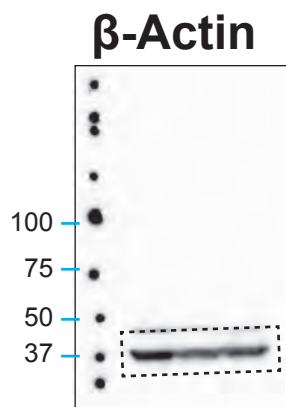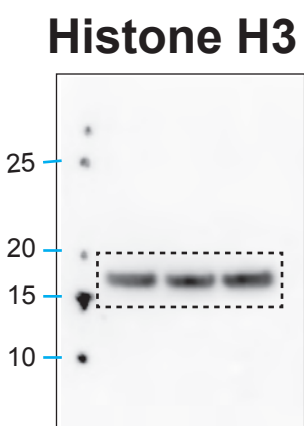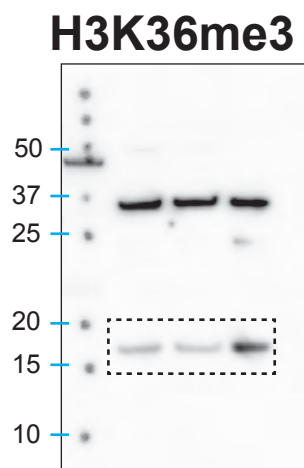

**Fig 4h**

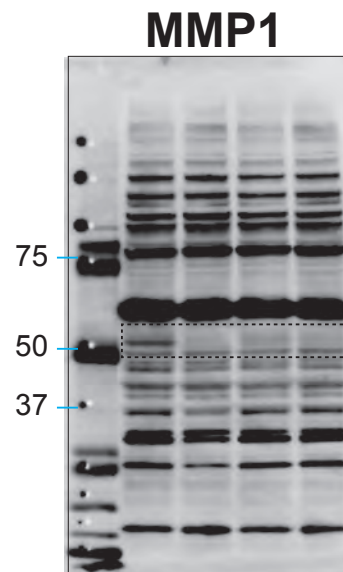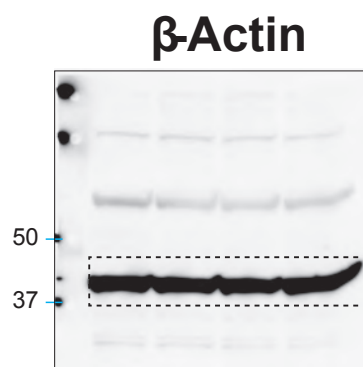

Supplement: NIHMS1759641-supplement-Figure_4_unprocessed_western_blots.pdf [file NIHMS1759641-supplement-Figure_4_unprocessed_western_blots.pdf]

**Fig 5a**

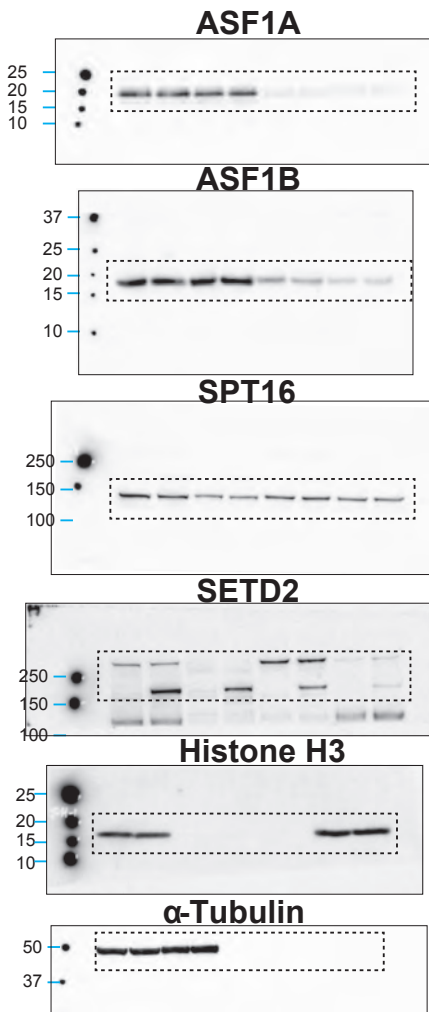

**Fig 5b**

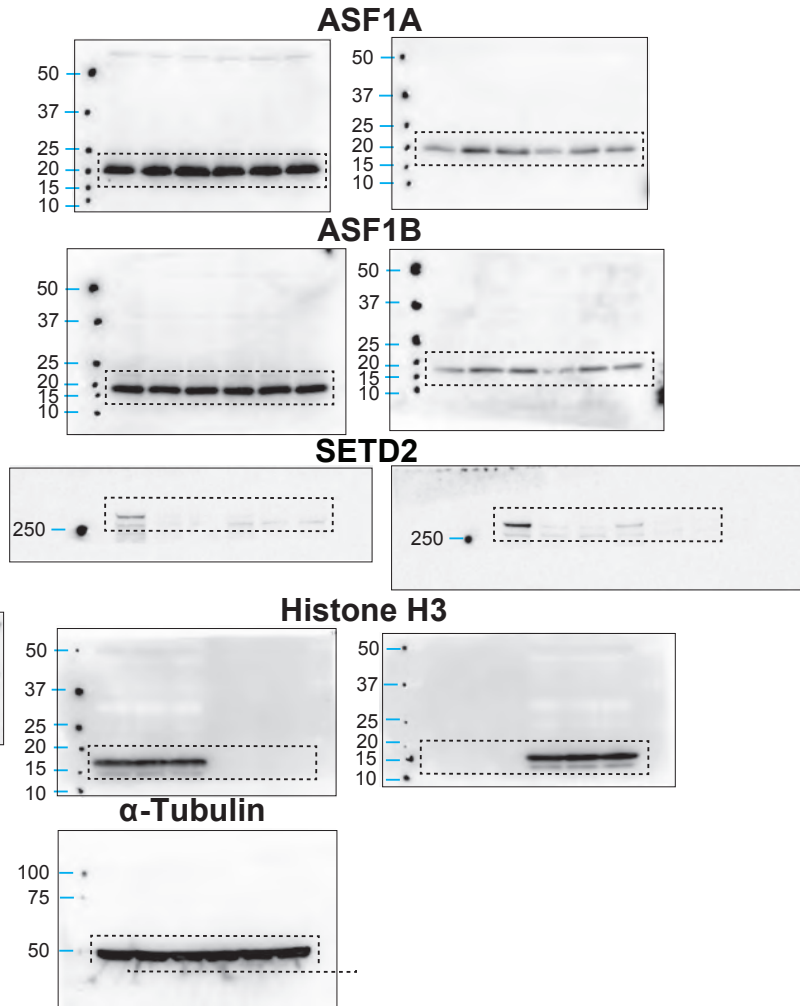

**Fig 5h**

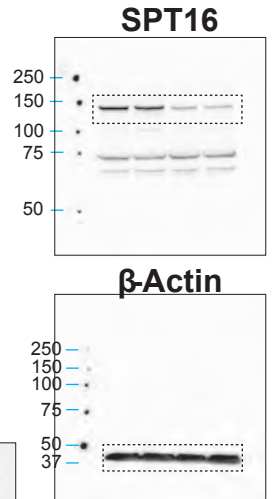

**Fig 5f**

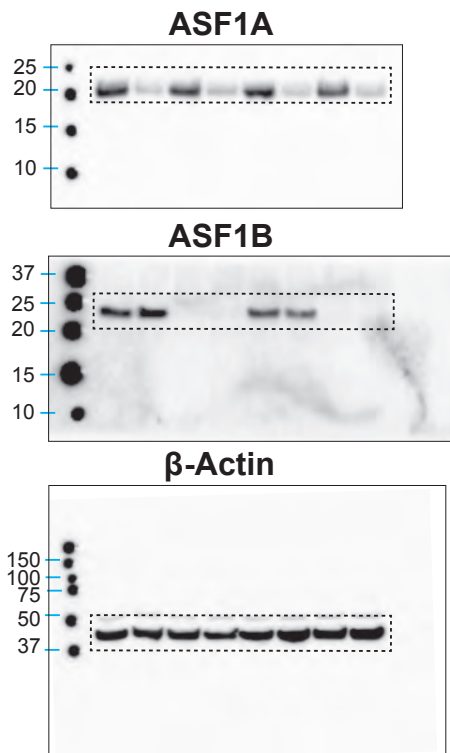

**Fig 5g**

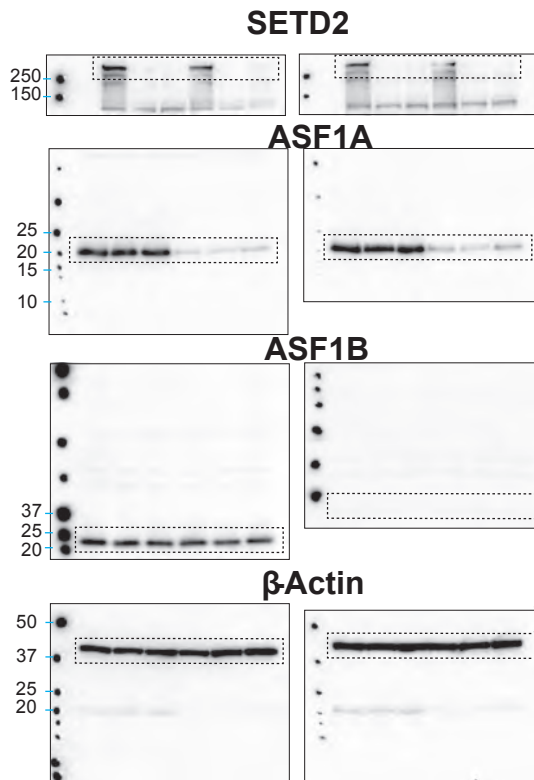

**Fig 5i**

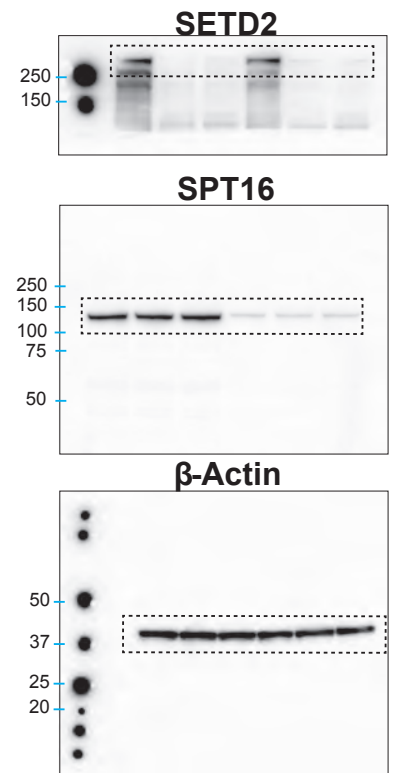

Supplement: NIHMS1759641-supplement-Figure_5_unprocessed_western_blots.pdf [file NIHMS1759641-supplement-Figure_5_unprocessed_western_blots.pdf]

**Fig 6c**

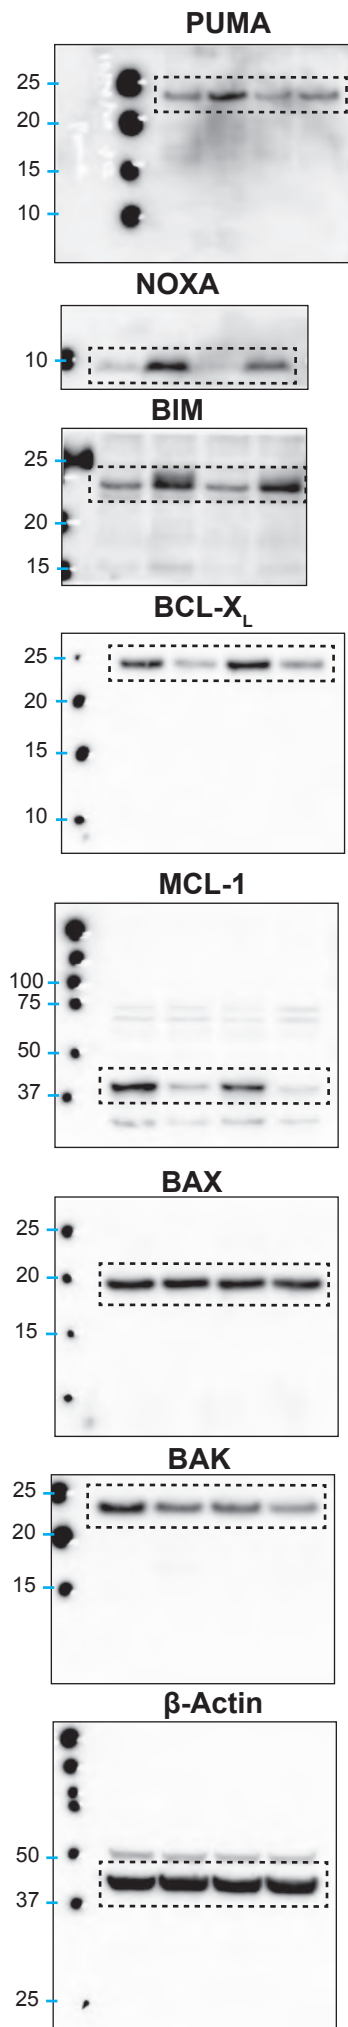

Supplement: NIHMS1759641-supplement-Figure_6_unprocessed_western_blots.pdf [file NIHMS1759641-supplement-Figure_6_unprocessed_western_blots.pdf]
